# Supplementary material
Source: PubMed Central journal article supplement (PMC2731434)
Supplement: NIHMS132599-supplement-01.pdf [file NIHMS132599-supplement-01.pdf]

Supporting Information for:  $\text{Cu}_3(\text{BTC})_2$  for the Removal of Ammonia from Contaminated Air Streams and Its Characterization by MAS NMR

Table S1. Raw nitrogen isotherm data collected for fresh  $\text{Cu}_3(\text{BTC})_2$ .

| P/Po     | Volume (cc/g @ STP) | P/Po     | Volume (cc/g @ STP) | P/Po     | Volume (cc/g @ STP) |
|----------|---------------------|----------|---------------------|----------|---------------------|
| 7.40E-06 | 131.5973333         | 8.23E-03 | 331.2526667         | 7.49E-01 | 409.658             |
| 1.57E-05 | 156.8873333         | 9.08E-03 | 332.1113333         | 8.02E-01 | 416.4306667         |
| 2.52E-05 | 170.5893333         | 1.27E-02 | 334.8726667         | 8.51E-01 | 428.3453333         |
| 3.49E-05 | 185.67              | 2.11E-02 | 340.0786667         | 9.02E-01 | 435.0033333         |
| 4.48E-05 | 203.4286667         | 3.14E-02 | 344.6293333         | 9.50E-01 | 436.262             |
| 5.48E-05 | 221.4473333         | 4.15E-02 | 347.8806667         | 9.93E-01 | 438.438             |
| 6.50E-05 | 238.1533333         | 5.18E-02 | 351.1833333         | 9.46E-01 | 438.6906667         |
| 7.52E-05 | 250.8346667         | 6.20E-02 | 353.2093333         | 8.98E-01 | 437.1193333         |
| 8.53E-05 | 259.518             | 7.15E-02 | 355.522             | 8.49E-01 | 434.9973333         |
| 9.46E-05 | 265.1073333         | 8.21E-02 | 357.5853333         | 7.98E-01 | 432.2026667         |
| 1.97E-04 | 287.442             | 9.22E-02 | 359.4126667         | 7.49E-01 | 427.9493333         |
| 2.97E-04 | 295.6933333         | 1.02E-01 | 361.2446667         | 6.99E-01 | 424.612             |
| 3.99E-04 | 300.5186667         | 1.50E-01 | 367.6473333         | 6.46E-01 | 423.442             |
| 5.03E-04 | 304.02              | 2.00E-01 | 372.6713333         | 5.98E-01 | 422.422             |
| 6.05E-04 | 306.5846667         | 2.50E-01 | 377.1646667         | 5.48E-01 | 419.8686667         |
| 7.07E-04 | 308.556             | 3.01E-01 | 380.7493333         | 4.98E-01 | 416.6246667         |
| 8.13E-04 | 310.228             | 3.51E-01 | 383.8613333         | 4.49E-01 | 390.7173333         |
| 9.07E-04 | 311.7653333         | 4.01E-01 | 386.6053333         | 3.98E-01 | 386.8566667         |
| 1.01E-03 | 312.8886667         | 4.51E-01 | 389.0866667         | 3.48E-01 | 383.2366667         |
| 2.05E-03 | 319.5493333         | 4.99E-01 | 392.3793333         | 2.98E-01 | 379.29              |
| 3.07E-03 | 322.9653333         | 5.50E-01 | 396.8306667         | 2.48E-01 | 375.13              |
| 4.08E-03 | 325.3213333         | 6.00E-01 | 399.7253333         | 1.98E-01 | 370.3893333         |
| 5.04E-03 | 327.0473333         | 6.50E-01 | 402.71              | 1.48E-01 | 365.5686667         |
| 6.08E-03 | 328.6513333         | 7.00E-01 | 405.8366667         | 9.83E-02 | 358.4426667         |
| 7.13E-03 | 330.0133333         | 7.49E-01 | 409.658             | 4.94E-02 | 347.6233333         |

Table S2. Raw nitrogen isotherm data collected for ammonia-exhausted  $\text{Cu}_3(\text{BTC})_2$  under dry conditions.

| P/Po     | Volume (cc/g @ STP) | P/Po     | Volume (cc/g @ STP) | P/Po     | Volume (cc/g @ STP) |
|----------|---------------------|----------|---------------------|----------|---------------------|
| 2.22E-05 | 0.111683168         | 8.35E-03 | 0.87480198          | 8.01E-01 | 17.95490099         |
| 3.45E-05 | 0.130643564         | 9.41E-03 | 0.915346535         | 8.50E-01 | 19.32163366         |
| 4.57E-05 | 0.144950495         | 1.04E-02 | 0.99029703          | 9.00E-01 | 20.58920792         |
| 5.58E-05 | 0.15539604          | 2.29E-02 | 1.396237624         | 9.49E-01 | 22.85178218         |
| 6.47E-05 | 0.163217822         | 3.29E-02 | 1.811881188         | 9.96E-01 | 31.54118812         |
| 7.21E-05 | 0.168910891         | 4.27E-02 | 2.067970297         | 9.49E-01 | 25.1839604          |
| 7.84E-05 | 0.172920792         | 5.27E-02 | 2.312623762         | 8.98E-01 | 22.33806931         |
| 8.36E-05 | 0.175544554         | 6.27E-02 | 2.478168317         | 8.48E-01 | 20.3539604          |
| 1.08E-04 | 0.190792079         | 7.25E-02 | 2.946633663         | 7.96E-01 | 21.24836634         |
| 1.08E-04 | 0.19019802          | 8.19E-02 | 4.363267327         | 7.48E-01 | 19.87831683         |
| 2.07E-04 | 0.237376238         | 9.25E-02 | 3.252277228         | 6.98E-01 | 18.41193069         |
| 3.16E-04 | 0.271287129         | 1.02E-01 | 3.953564356         | 6.47E-01 | 17.11475248         |
| 4.20E-04 | 0.29509901          | 1.52E-01 | 5.523762376         | 5.97E-01 | 15.61465347         |
| 5.23E-04 | 0.313514851         | 2.02E-01 | 6.982524752         | 5.48E-01 | 14.06212871         |
| 6.25E-04 | 0.328613861         | 2.52E-01 | 7.947772277         | 4.97E-01 | 14.07811881         |
| 7.29E-04 | 0.341435644         | 3.02E-01 | 8.209752475         | 4.47E-01 | 12.88207921         |
| 8.30E-04 | 0.352128713         | 3.51E-01 | 9.567673267         | 3.97E-01 | 9.84009901          |
| 9.34E-04 | 0.364554455         | 4.01E-01 | 9.684455446         | 3.47E-01 | 9.316782178         |
| 1.01E-03 | 0.406039604         | 4.51E-01 | 11.57851485         | 2.97E-01 | 8.659059406         |
| 2.08E-03 | 0.515445545         | 5.01E-01 | 12.10529703         | 2.47E-01 | 7.361138614         |
| 3.17E-03 | 0.59509901          | 5.51E-01 | 13.06212871         | 1.97E-01 | 6.510148515         |
| 4.21E-03 | 0.656386139         | 6.01E-01 | 13.93490099         | 1.47E-01 | 4.928762376         |
| 5.25E-03 | 0.71                | 6.51E-01 | 14.5879703          | 9.72E-02 | 3.080940594         |
| 6.28E-03 | 0.78039604          | 7.01E-01 | 15.19019802         | 4.73E-02 | 1.151386139         |
| 7.32E-03 | 0.832277228         | 7.50E-01 | 17.15465347         | 8.01E-01 | 17.95490099         |

Table S3. Raw nitrogen isotherm data collected for ammonia-exhausted  $\text{Cu}_3(\text{BTC})_2$  under wet conditions.

| P/P <sub>0</sub> | Volume (cc/g @ STP) | P/P <sub>0</sub> | Volume (cc/g @ STP) | P/P <sub>0</sub> | Volume (cc/g @ STP) |
|------------------|---------------------|------------------|---------------------|------------------|---------------------|
| 1.39E-05         | 2.986909091         | 8.17E-03         | 24.42672727         | 8.00E-01         | 137.5743636         |
| 2.08E-05         | 3.620727273         | 9.59E-03         | 21.55381818         | 8.52E-01         | 159.7570909         |
| 3.51E-05         | 4.562363636         | 1.02E-02         | 21.89018182         | 9.01E-01         | 266.4618182         |
| 4.26E-05         | 4.981454545         | 2.21E-02         | 24.32127273         | 9.52E-01         | 369.3545455         |
| 5.44E-05         | 5.496               | 3.27E-02         | 27.53490909         | 9.95E-01         | 440.0254545         |
| 6.00E-05         | 5.728909091         | 4.23E-02         | 32.42254545         | 9.47E-01         | 410.0854545         |
| 7.44E-05         | 6.226545455         | 5.27E-02         | 33.64054545         | 9.01E-01         | 361.3054545         |
| 8.07E-05         | 6.429090909         | 6.27E-02         | 31.52054545         | 8.50E-01         | 307.8127273         |
| 9.76E-05         | 6.889818182         | 7.27E-02         | 33.28527273         | 8.00E-01         | 197.9527273         |
| 1.04E-04         | 7.057090909         | 8.27E-02         | 35.40872727         | 7.49E-01         | 131.3129091         |
| 2.28E-04         | 9.108909091         | 9.26E-02         | 34.99618182         | 7.00E-01         | 104.7838182         |
| 3.00E-04         | 9.923636364         | 1.02E-01         | 32.36163636         | 6.49E-01         | 88.32090909         |
| 4.02E-04         | 10.83963636         | 1.52E-01         | 39.65454545         | 5.98E-01         | 79.06127273         |
| 5.11E-04         | 11.65690909         | 2.02E-01         | 48.22818182         | 5.48E-01         | 69.51545455         |
| 6.20E-04         | 12.33272727         | 2.51E-01         | 57.16581818         | 4.98E-01         | 60.31090909         |
| 7.28E-04         | 12.91654545         | 3.02E-01         | 59.64636364         | 4.47E-01         | 55.48327273         |
| 8.02E-04         | 13.28527273         | 3.51E-01         | 67.33872727         | 3.98E-01         | 48.38327273         |
| 9.29E-04         | 13.84963636         | 4.01E-01         | 72.82727273         | 3.48E-01         | 40.35472727         |
| 1.00E-03         | 14.37890909         | 4.51E-01         | 76.46181818         | 2.98E-01         | 31.83036364         |
| 2.03E-03         | 17.40981818         | 5.00E-01         | 86.48127273         | 2.48E-01         | 22.66090909         |
| 3.09E-03         | 19.394              | 5.50E-01         | 93.54818182         | 1.98E-01         | 14.836              |
| 4.05E-03         | 20.70854545         | 6.00E-01         | 99.996              | 1.48E-01         | 2.489818182         |
| 5.08E-03         | 21.84545455         | 6.50E-01         | 102.3325455         | 9.73E-02         | -8.130909091        |
| 6.13E-03         | 22.80545455         | 7.00E-01         | 110.3447273         | 4.77E-02         | -15.92727273        |
| 7.16E-03         | 23.67109091         | 7.49E-01         | 126.1750909         |                  |                     |

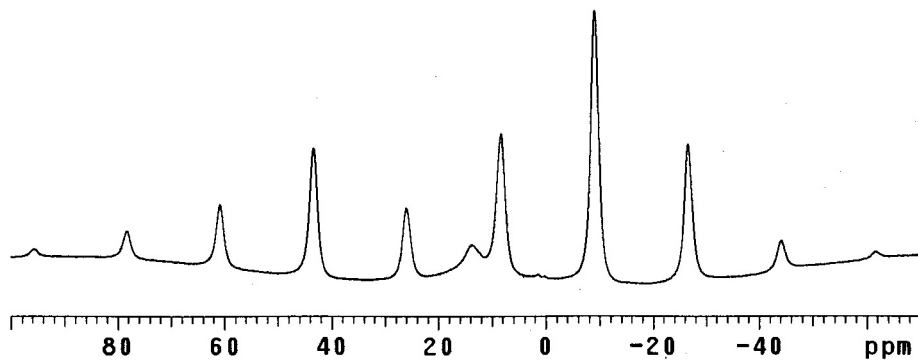

Figure S1.  $^1\text{H}$  MAS NMR spectrum obtained for Soxhlet-Extracted (MeOH)  $\text{Cu}_3(\text{BTC})_2$ .

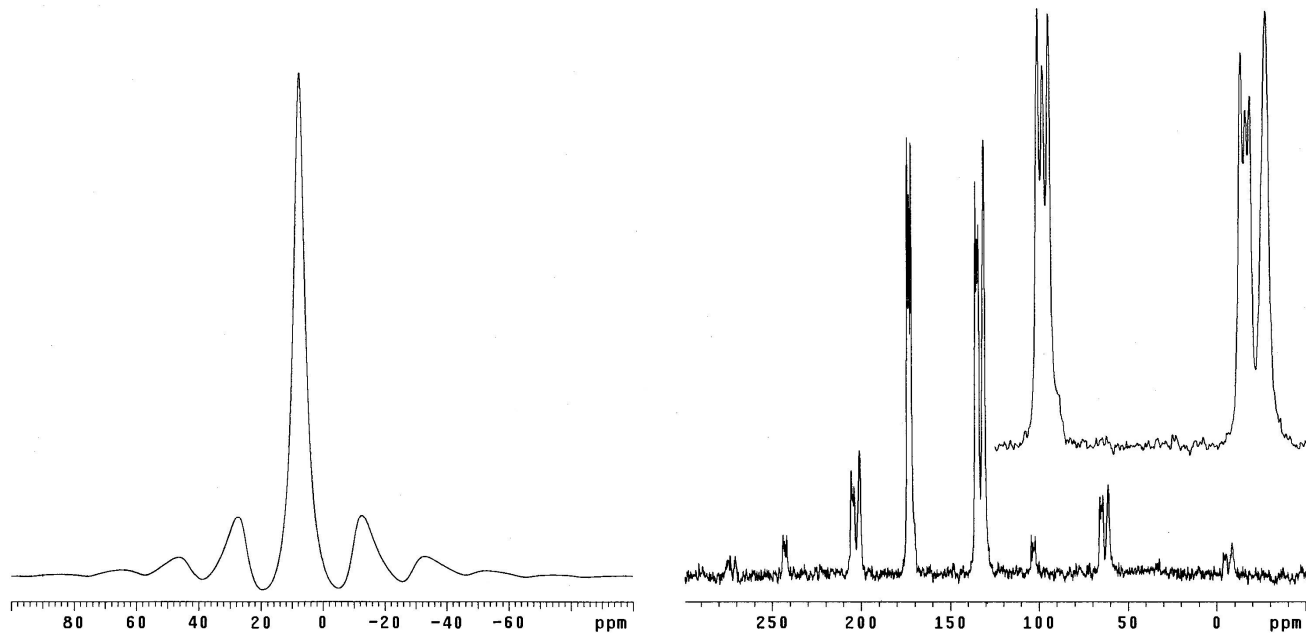

Figure S2.  $^1\text{H}$  MAS (left) and  $^{13}\text{C}$  CP-MAS (right) NMR spectra (9.4 T,  $\nu_{\text{R}} = 7000$  Hz) obtained for  $(\text{NH}_4)_3\text{BTC}$ . Inset shows splittings of  $\text{CO}_2^-$  (173.0,  $J_{\text{CON}} = 103$  Hz) and  $=\text{C}<$  (134.8,  $J_{\text{CCON}} = 85$  Hz) resonances attributed to  $^{14}\text{N}$  ( $I = 1$ )  $J$ -couplings, which are smaller for the more distant  $=\text{C}<$  carbon. The methine (CH) carbon (131.0 ppm; furthest removed from the  $\text{NH}_4$ -groups) does not exhibit detectable splittings.

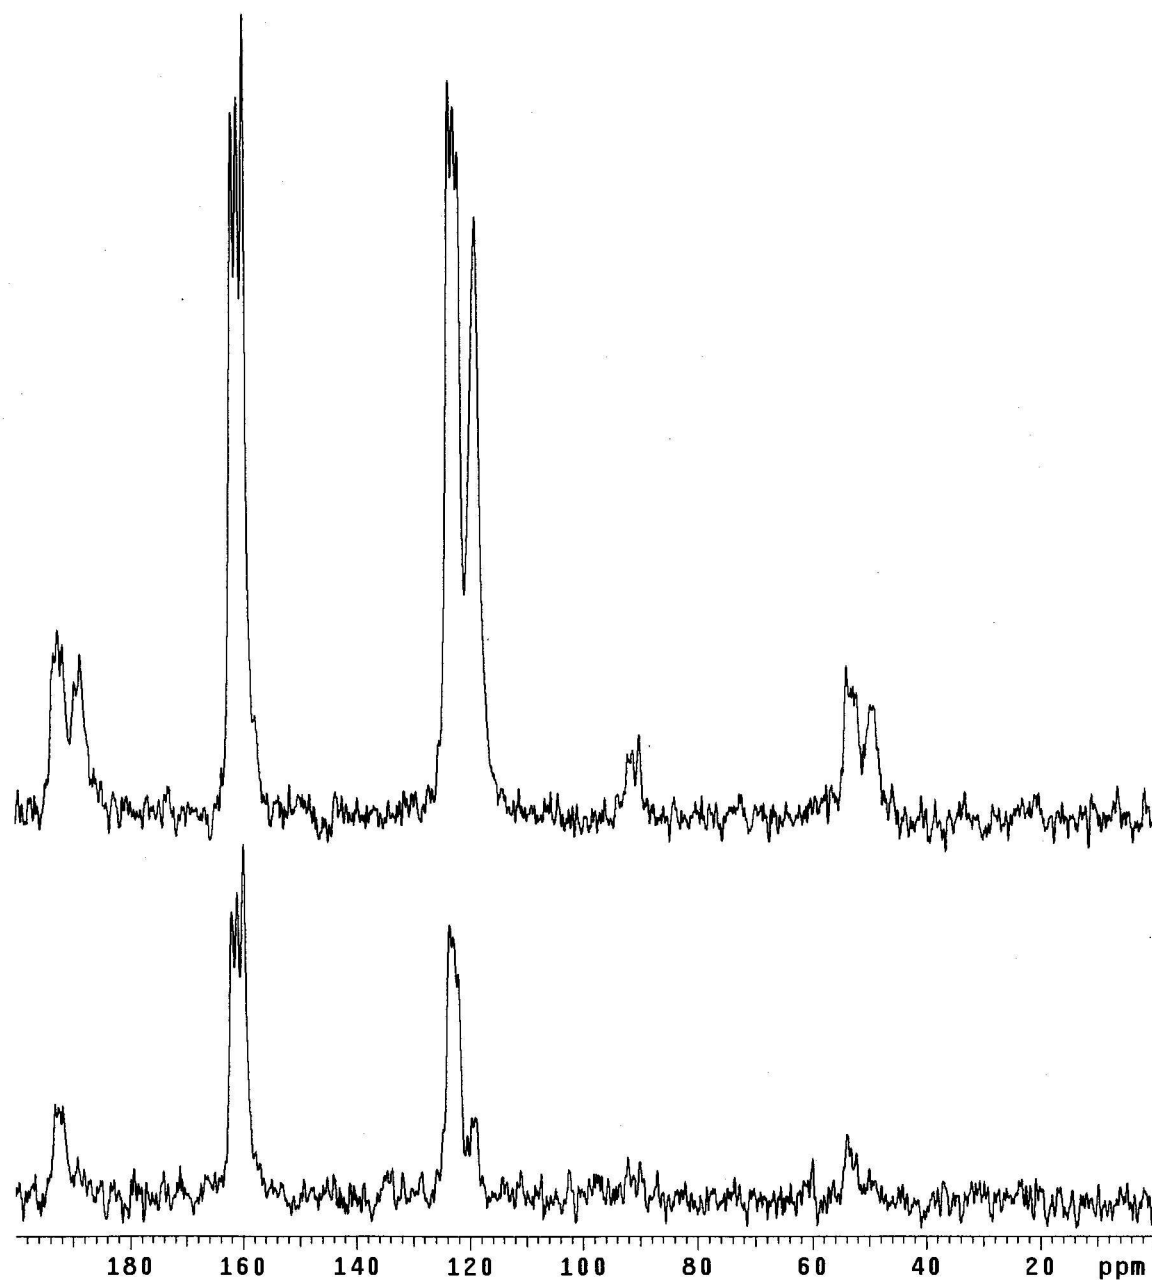

Figure S3.  $^{13}\text{C}$ - $^1\text{H}$  CP-MAS NMR dipolar recoupling spectra (9.4 T,  $\nu_R = 7000$  Hz) obtained for  $(\text{NH}_4)_3\text{BTC}$ . The top spectrum is the “ $S_o$ ” spectrum obtained in the absence of  $^1\text{H}$  recoupling pulses. The bottom spectrum, “ $S$ ”, shows the reduced signal intensity resulting from the applied  $^1\text{H}$  recoupling pulses.

Figure S4. MAS NMR  $^{13}\text{C}$ - $^1\text{H}$  dipolar recoupling pulse sequence for Varian NMR spectrometers.

```

1
2
3  /* Modification of Varian XPOLAR1 sequence to
4  * 13C-1H Dipolar Recoupling Pulse Sequence
5  * Ishii et al. JACS 125 (2003) 3438-3439
6  * George W. Wagner, U.S. Army ECBC
7  */
8
9  /* xpol = 'y' gives cross polarization
10     'n' gives direct polarization
11
12     pw - the observe 90 degree pulse
13
14     pw2 - proton 90 degree recoupling pulse
15
16     cntct - hartmann-hahn contact time
17
18     dipolr - controls fine decoupler power during acquisition time.
19
20 */
21 #include <standard.h>
22
23 static int table1[4] = {0, 1, 2, 3};
24 static int table2[4] = {1, 1, 3, 3};
25 static int table3[4] = {3, 0, 3, 0};
26 static int table4[4] = {1, 2, 1, 2};
27
28 pulsedsequence()
29 {
30     /* declare new variables */
31     double      dutycycle,
32                pw2,
33                cntct,
34                srate,
35                crossp,
36                dipolr;
37
38     char        xpol[MAXSTR];
39
40     /* set variables */
41     cntct = getval("cntct");
42     at = getval("at");
43     pw2 = getval("pw2");
44     crossp = getval("crossp");
45     dipolr = getval("dipolr");
46     srate = getval("srate");
47     getstr("xpol", xpol);
48
49     /*check dutycycle -
50     do not accept dm=y or decoupler duty cycles in excess of 20% */
51     dutycycle = (d1 + d2) / (cntct + pw + d1 + d2 + at);
52     fprintf(stdout, "Duty cycle is %5.2f%%. Doing ", (1.0 - dutycycle) * 100);
53
54     if ((dutycycle < 0.8) || (dm[0] == 'y'))
55
56
57
58
59
60

```

```
1 {
2   fprintf(stdout, "ABORT! The duty cycle must be less than 20%%.\nPlease adj
3   abort(1);
4 }
5 /*begin pulse sequence*/
6
7   if (xpol[0] == 'n')          /*direct polarization (dp)*/
8   {
9     fprintf(stdout, "Bloch decay");
10
11     settable(t1,4,table1);
12     settable(t3,4,table3);
13     settable(t4,4,table4);
14     setreceiver(t1);
15
16     status(A);
17     decpwrp(dipolr);
18     delay(d1);
19     rcvloff();
20     delay(rofl);
21     rgpulse(pw, t1, 0.0 , 0.0);
22     status(B);
23 }
24 else
25 {                               /* cross-polarization (cp)*/
26
27   fprintf(stdout, "Cross polarization");
28
29   settable(t1,4,table1);
30   settable(t2,4,table2);
31   settable(t3,4,table3);
32   settable(t4,4,table4);
33   setreceiver(t1);
34
35   status(A);
36   decpwrp(crossp);
37   delay(d1);
38   rcvloff();
39   delay(rofl);
40
41   decpulse(pw, t2);
42   status(C);
43   decphase(zero);
44   rgpulse(cntct, t3, 0.0, 0.0);
45   status(B);
46   decpwrp(dipolr);
47 }
48
49 /* Begin Dipolar Rephasing Pulses */
50
51   delay(0.5 / srate - pw2);
52   decpulse(2.0 * pw2, t1);
53   delay(0.5 / srate - pw - pw2);
54   rgpulse(2.0 * pw, t1, 0.0, 0.0);
55   delay(0.5 / srate - pw - pw2);
56   decpulse(2.0 * pw2, t1);
57   delay(0.5 / srate - pw2);
58
59   status(C);
60
61   fprintf(stdout, ".\n");
62
63 /*begin acquisition*/
64
65   rcvron();
66 }
```

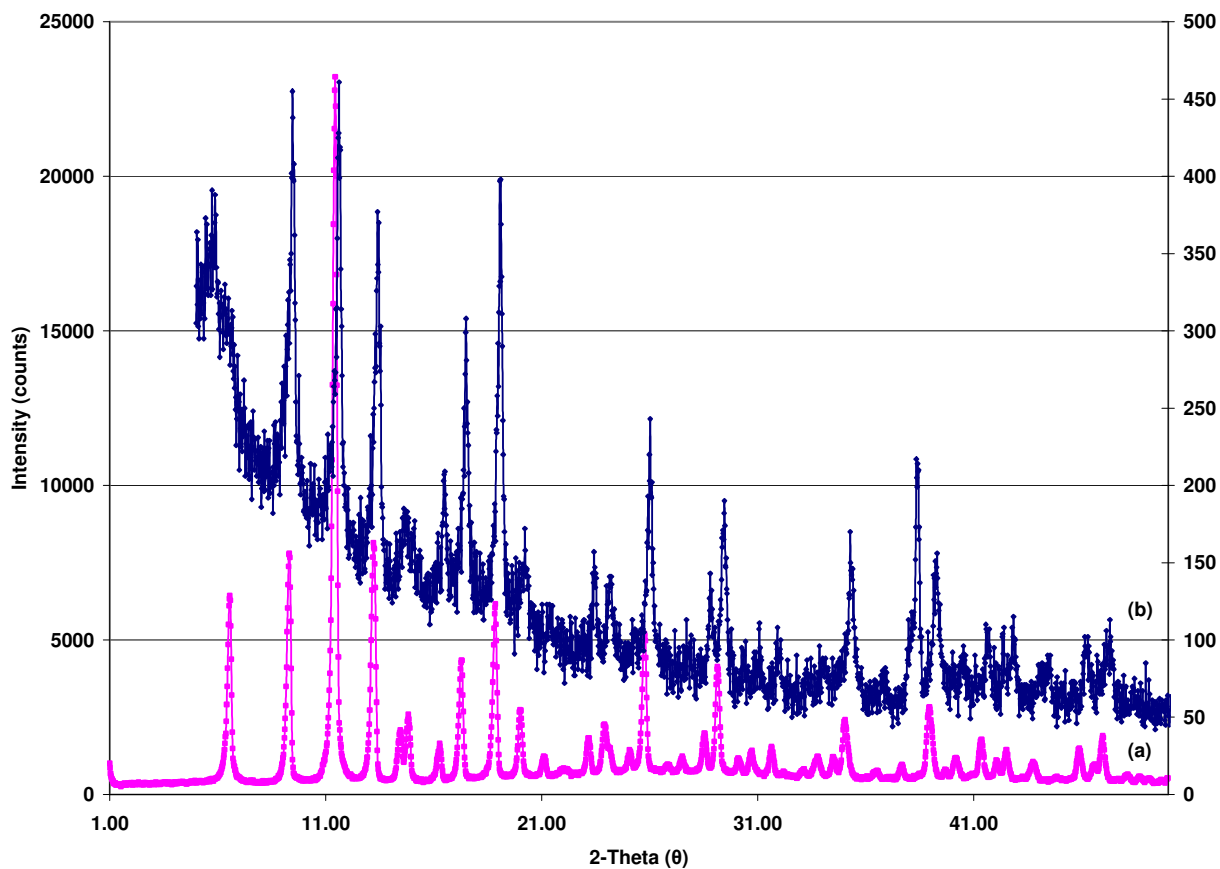

Figure S5. Comparison of X-ray patterns of different Cu<sub>3</sub>(BTC)<sub>2</sub> starting materials. Sample (a) is a powder from well-formed framework Cu<sub>3</sub>(BTC)<sub>2</sub> material whereas sample (b) indicates some differences from the well-formed framework Cu<sub>3</sub>(BTC)<sub>2</sub> material.



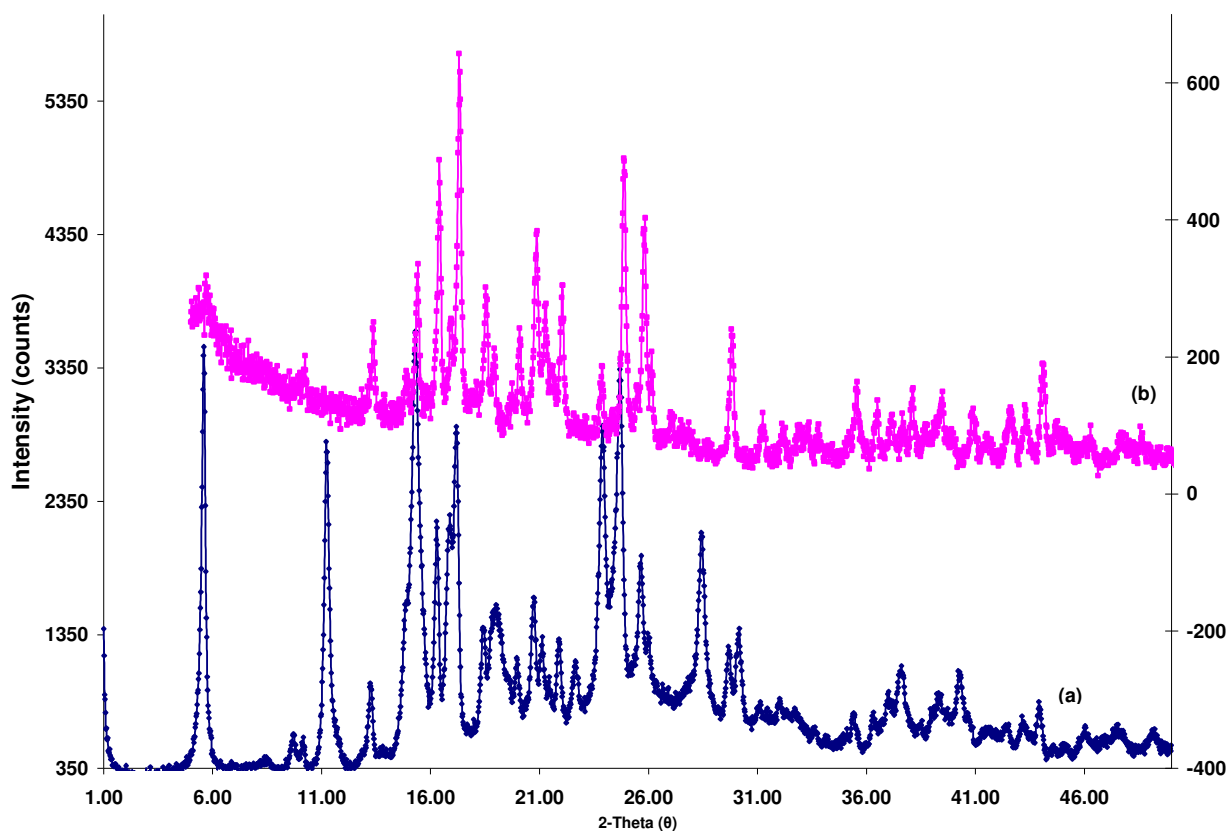

Figure S6. Comparison of X-ray patterns of different Cu<sub>3</sub>(BTC)<sub>2</sub> materials exposed to humid ammonia vapors. Sample (a) is a powder from well-formed framework Cu<sub>3</sub>(BTC)<sub>2</sub> material whereas sample (b) indicates some differences from the well-formed framework Cu<sub>3</sub>(BTC)<sub>2</sub> material.

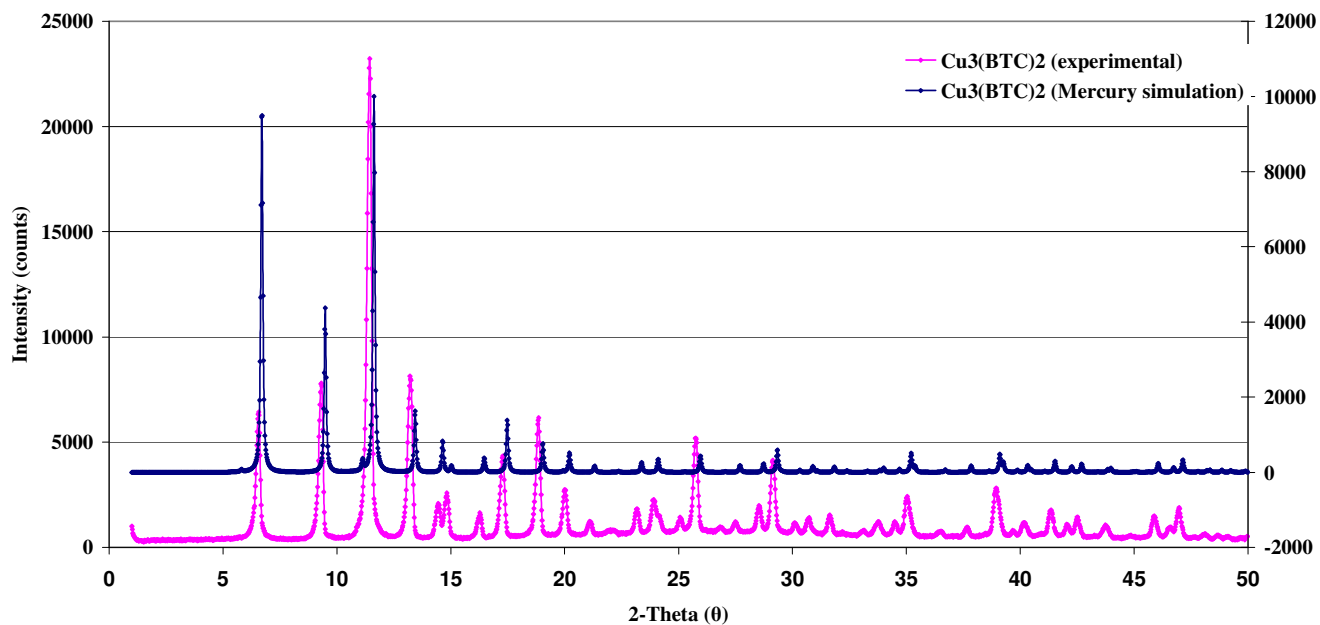

Figure S7. Comparison of PXRd pattern of experimental and Mercury simulation<sup>1</sup> of Cu<sub>3</sub>(BTC)<sub>2</sub> material.

Table S4. Comparison of PXRD peak values of experimental and Mercury simulation of  $\text{Cu}_3(\text{BTC})_2$  material.

| This paper |                                 | Mercury* simulation (Chiu data) |                                 |
|------------|---------------------------------|---------------------------------|---------------------------------|
| 2-Theta    | Relative intensity <sup>a</sup> | 2-Theta                         | Relative intensity <sup>a</sup> |
| 6.5685245  | 0.2772                          | 6.71554                         | 0.9740                          |
| 9.3212668  | 0.3360                          | 9.48925                         | 0.6613                          |
| 11.44361   | 1.0000                          | 11.6326                         | 1.0000                          |
| 13.208727  | 0.3507                          | 13.4397                         | 0.4039                          |
| 14.826751  | 0.1117                          | 14.6374                         | 0.2884                          |
| 17.285308  | 0.1872                          | 17.4742                         | 0.3719                          |
| 18.861305  | 0.2653                          | 19.0502                         | 0.2761                          |
| 19.996023  | 0.1181                          | 20.2059                         | 0.2274                          |
| 25.753667  | 0.2240                          | 25.9634                         | 0.2088                          |
| 29.136809  | 0.1783                          | 29.3465                         | 0.2433                          |
| 38.95002   | 0.1219                          | 39.0966                         | 0.2189                          |

\*Mercury simulation conditions:

- 1-50° 2 theta

- 0.02101° (2 theta) Step size (exact experimental step size was 0.021013° (2 theta))

- FWHM 0.5 (2 theta)

<sup>a</sup> Relative intensity above.1 are only listed for peak PXRD values

## References

<sup>1</sup> [http://www.ccdc.cam.ac.uk/free\\_services/mercury/](http://www.ccdc.cam.ac.uk/free_services/mercury/).

---
